**Title:** Post-acute health care costs following SARS-CoV-2 infection: A retrospective cohort study of among 531,182 matched adults

**Short title:** Post-acute COVID health care costs

\*Candace D. McNaughton MD PhD MPH<sup>1,2,3,4</sup>, Peter C. Austin PhD<sup>1,2,5</sup>, Zhiyin Li MScPH<sup>1</sup>, Atul Sivaswamy MSc<sup>1</sup>, Jiming Fang PhD<sup>1</sup>, Husam Abdel-Qadir MD PhD<sup>1,4,5,6,7</sup>, Jacob A. Udell MD MPH<sup>1,4,5,6,7</sup>, Walter Wodchis PhD<sup>1,2</sup>, Douglas S. Lee, MD PhD<sup>1,4,6,8,9</sup>, Ivona Mostarac, RN MPH<sup>2</sup>, Clare L. Atzema MD MSc<sup>1,2,3,4,5</sup>

**Affiliations:**

1. ICES (formerly, the Institute for Clinical Evaluative Sciences), Toronto, ON, Canada
2. Sunnybrook Research Institute, Toronto, Ontario, Canada
3. Sunnybrook Health Sciences Centre, Toronto, Ontario, Canada
4. Department of Medicine, University of Toronto, Toronto, Ontario, Canada
5. Institute of Health Policy, Management and Evaluation, University of Toronto, Toronto, Ontario, Canada
6. Peter Munk Cardiac Centre, Toronto General Hospital, Toronto, Ontario, Canada
7. Division of Cardiology, Women's College Hospital, Toronto, Ontario, Canada
8. Department of Medical Imaging, University Health Network, University of Toronto, Toronto, Ontario, Canada
9. Ted Rogers Centre for Heart Research, Toronto, Ontario, Canada

All authors have seen and approved the manuscript.

Competing interests: None

**\*Corresponding author:** Candace D. McNaughton, 2075 Bayview Ave., Room G1 39 Toronto, ON, M4N 3M5, Email: [candace.mcnaughton@utoronto.ca](mailto:candace.mcnaughton@utoronto.ca)

## **Abstract**

Post-acute health care costs following SARS-CoV-2 infection are not known. Beginning 56 days following SARS-CoV-2 polymerase chain reaction (PCR) testing, we compared person-specific total and component health care costs across their distribution for the following year (test-positive versus test-negative, matched people; January 1, 2020-March 31, 2021). For 531,182 individuals, mean person-specific total health care costs were \$513.83 (95% CI \$387.37-\$638.40) higher for test-positive females and \$459.10 (95% CI \$304.60-\$615.32) higher for test-positive males, or >10% increase in mean per-capita costs, driven by hospitalization, long-term care, and complex continuing care costs. At the 99<sup>th</sup> percentile of each subgroup, person-specific health care costs were \$12,533.00 (95% CI \$9,008.50-\$16,473.00) higher for test-positive females and \$14,604.00 (95% CI \$9,565.50-\$19,506.50) for test-positive males, driven by hospitalization, specialist (males), and homecare costs (females). Cancer costs were lower. Six-month and 1-year costs differences were similar. These findings can inform planning for post-acute SARS-CoV-2 health care costs.

## **Introduction/Background**

It is difficult to overstate the importance of the COVID-19 pandemic as a new public health threat, with more than a total of 6.8 million deaths worldwide and at least half of Canadians infected as of August 2022.<sup>1-3</sup> In the relatively new context of widespread, on-going transmission of this airborne pathogen, there is growing recognition of the considerable health burden and costs beyond the acute phase of COVID-19.<sup>4</sup> There is growing evidence that infection caused by the airborne SARS-CoV-2 virus has longer-term health effects such as increased risk of metabolic derangements, auto-immune conditions, and cardiovascular disease, as well as evidence that post-acute complications can occur across the spectrums of age and severity of the acute infection.<sup>5-10</sup> COVID-19 and its downstream costs are among the most pressing challenges to the long-term health of Canadians and sustainability of the Canadian health care system.<sup>11</sup>

Health care use following SARS-CoV-2 infection is higher than in otherwise similar, uninfected individuals, even months following infection and among those who were not hospitalized acutely, and the distribution of health care use increase is right skewed, with a small proportion of individuals experiencing markedly greater health care use.<sup>12,13</sup> However, differences in direct health care costs following infection are not well understood and, in light of the sheer number of on-going infections, are necessary to understand in order to better anticipate and plan for the magnitude, duration, and types of potential increases in health care costs.

We therefore compared health care costs of community-dwelling adults starting  $\geq 56$  days following a positive SARS-CoV-2 polymerase chain reaction (PCR) to matched individuals who tested negative for SARS-CoV-2.

## **Methods**

### *Study Design*

This retrospective cohort was constructed using population-level administrative and health care data linked and held at ICES, formerly known as the Institute for Clinical Evaluative Sciences. ICES is a non-profit research institute funded by, but independent of, the Ontario Ministry of Health and the Ontario Ministry of Long-Term Care to evaluate health care delivery and outcomes to inform health care policies. In accordance with Ontario's Personal Health Information Protection Act (section 45) permitting collection and analysis of health care and demographic data for health system evaluation, individual consent was not obtained.<sup>14</sup>

### *Cohort creation*

All community-dwelling adults ( $\geq 18$  years of age) in Ontario, Canada with sufficient demographic information for data linkage (valid date of birth, sex, and death information) who underwent PCR testing for SARS-CoV-2 between January 1, 2020 and March 31, 2021 and were alive eight weeks (56 days) after the date of PCR test were included. During this time, SARS-CoV-2 PCR tests were generally widely available and free-of-charge, and testing was performed entirely within the health care system of Ontario, which pays for all necessary physician and hospital services for >98% of the 14.2 million residents of Ontario. Datasets used for cohort construction and variable definitions are listed in Supplemental Tables E1 and E2, respectively.

### *Exposure definition*

Individuals were categorized as test-positive as of the date of their first positive outpatient SARS-CoV-2 PCR test. Individuals were categorized as test-negative if all PCR results during the study time were negative. PCR results reported as pending or indeterminate (<0.02%) were excluded. The index date was defined as the date of first positive outpatient SARS-CoV-2 PCR test or, for individuals with only negative PCR

test(s), the last test date. Symptoms of acute SARS-CoV-2 infection generally resolve within eight weeks,<sup>15-18</sup> follow-up to assess post-acute health care costs began eight weeks (56 days) after the index date and ended on May 26, 2022 or death, whichever occurred first.

### *Matching*

Individuals with a positive SARS-CoV-2 PCR test result were matched to those with only negative test results by sex/pregnancy status, pandemic period (2-week intervals), public health unit, vaccination status, and a propensity score computed from a large set of demographic, clinical, and health services factors, including component health care costs in year prior to the index PCR date, age, baseline socio-demographics and clinical characteristics, neighborhood level socioeconomic indices, and COVID vaccination status (Table E2).<sup>19</sup> Subjects were matched on the logit of the propensity score using a caliper width equal to 0.05 times the standard deviation of the propensity score.<sup>20</sup> A standardized difference <0.1 for comparing baseline characteristics between exposure groups was considered as indicative of good balance between exposure groups.<sup>19,21</sup>

### *Outcome definitions*

The primary outcome was the person-specific cost of health care over the first year of follow-up, i.e., the amount of money per-person spent by the Ontario Ministries of Health and Long Term Care, which pays for all medical care in the universal health care system. Costs for physician and hospital services are standard across Ontario and include the following 11 mutually exclusive component costs: hospital-based care costs; emergency department visit costs; outpatient (primary care, specialist, cancer care) costs; outpatient medication costs (for people aged ≥65 years); outpatient laboratory costs; rehabilitation costs; mental health hospitalization costs; complex and continuing care costs; homecare costs; and long-term care costs. Because types of health care

vary by health care system, descriptions of component health care costs are included in Supplemental Table E1. Observed total and component health care costs in the period starting 56 days after the index PCR test date were summed and divided by the number of days of follow-up (i.e., exposure time), and then multiplied by 365 days to calculate annual per-person costs. For patients hospitalized at the start of follow-up, hospital-based costs were prorated so that only hospital-based costs that occurred during follow-up were included.

Cost differences were computed for test-positive versus test-negative individuals at the mean, median, 95<sup>th</sup> percentile, and 99<sup>th</sup> percentiles of health care costs. Note that mean component costs are additive, but this is not the case for median, 95<sup>th</sup> percentile, or 99<sup>th</sup> percentile component costs. All costs were standardized to the value of the Canadian dollar in 2020.

Secondary outcomes included the following dichotomous outcomes for outpatient cancer, rehabilitation, home care, mental health admission, complex continuing care, and long-term care costs, overall and stratified by sex: 1) being a high-cost health care user, defined as > 95<sup>th</sup> percentile of total health care costs from the matched cohort,<sup>22,23</sup> and 2) any reported post-acute health care cost, i.e., evidence of any post-acute health care seeking behaviour or access. We also estimated the risk of entrance to long-term care (i.e., nursing home) during 6-month and 1-year follow-up.

### *Statistical Analyses*

Baseline characteristics of the unmatched and matched cohorts were reported as means with standard deviations (SD), medians and interquartile ranges (IQR), or frequencies, as appropriate. Total and component annualized health care costs based on 1-year and 6-month follow-up were reported as means (SDs) and medians (Q1, Q3).

Based on prior studies indicating interaction by sex,<sup>13,24,25</sup> we assessed for potential interaction by sex in the matched cohort using a P-value threshold <0.10. This

revealed evidence of interaction with some component costs (outpatient medication, outpatient primary care, outpatient laboratory, rehabilitation care, homecare, mental health admissions, and long-term care component costs; Supplemental Table E3). Therefore, analyses were performed for the overall cohort as well as stratified by sex.

To compare health care costs across a right-skewed distribution, person-specific annualized costs for matched test-positive versus negative individuals were compared at the mean (by paired T-test), median, 95<sup>th</sup> percentile, and 99<sup>th</sup> percentile (by Wilcoxon signed rank test),<sup>26</sup> and 95% CI's were generated by bootstrapping with 2000 bootstrap replicates.<sup>27</sup> Sensitivity analyses censored at admission to long-term care and six months. Relative risks (RR) were computed for 6-month and 1-year high-cost health care use and any post-acute health care for six component costs (outpatient cancer care, rehabilitation, home care, mental health hospitalization, complex continuing care, and long-term care). The 95% CI RR were estimated using methods appropriate for matched data.<sup>28</sup> All analyses were performed in SAS v. 9.04.

## Results

Between January 1, 2020 and March 31, 2021 there were >11 million SARS-CoV-2 PCR tests completed for 3,777,451 unique adults. Of the 3,631,040 individuals who met the study inclusion criteria, 268,521 (7.4%) had a positive SARS-CoV-2 PCR test, and 99% of test-positive individuals were successfully matched to a test-negative control. The resulting matched cohort consisted of 531,182 individuals (Supplemental Figure E1).

Demographics, clinical characteristics, and standardized differences comparing the distribution of baseline characteristics between positive and negative individuals for the matched and the unmatched cohorts are reported in Table 1 and Supplemental Table E4, respectively. Compared to the unmatched cohort, the matched cohort was slightly younger and had higher proportion of males, urban, lower income, ethnically diverse neighborhoods with overall slightly lower prevalence of comorbid conditions and lower baseline health care costs. In addition, individuals in the matched cohort were less likely to have received any COVID vaccine dose, and they more often underwent PCR testing during late 2020 or early 2021 compared to the unmatched cohort.

### *Total person-specific annualized health care costs*

Differences in annual total and component health care costs per person, overall and stratified by sex, comparing matched test-positive and test-negative people are shown in Figure 1 (comparison of mean annualized costs, range -\$100 to +\$600) and Figure 2 (comparison of 99<sup>th</sup> percentile annualized costs, range -\$1,000 to +20,000). Comparisons at median and 95<sup>th</sup> percentiles are found in Supplemental Figures E2 and E3, respectively.

Mean person-specific total health care costs in the first year of follow-up were \$487.08 (95% CI \$393.69, \$593.28) higher for test-positive compared to test-negative matched individuals. For test-positive females, mean person-specific total health care



costs were \$513.83 (95% CI \$387.37, \$638.40) higher in the first year of follow-up, and test-positive males had \$459.10 (95% CI \$304.60, \$615.32) higher total health care costs compared to matched test-negative individuals.

At the 99<sup>th</sup> percentile, test-positive individuals had \$13,306.00 (95% CI, \$10,004.00, \$16,965.50) greater annual total health care costs compared to test-negative people, with an increase of \$12,533.00 (95% CI % \$9,008.50, \$16,473.00) for test-positive females, and \$14,604.00 (95% CI \$9,565.50, \$19,506.50) for test-positive males compared to their matched, test-negative counterparts.

#### *Component health care costs*

The largest differences in mean component costs in the first year of follow-up for test-positive individuals were for hospital-based care (\$244.83, 95% CI \$188.59, \$301.22), long-term care (\$102.16, 95% CI \$90.09, \$113.89), and complex continuing care (\$79.28, 95% CI \$49.98, \$107.96). There were also smaller but significantly higher costs for outpatient specialist, rehabilitation, emergency department, outpatient primary care (for females only, with no detected difference for males), and outpatient laboratory costs for test-positive individuals, and overall no detected differences in outpatient medication, mental health admission costs (no difference for males; decreased costs for test-positive females), or homecare (increased for females, no difference for males). Mean person-specific outpatient cancer care costs were lower (-\$75.89, 95% CI -\$96.71, -\$54.45) over the first year of follow-up for test-positive individuals.

At the 99<sup>th</sup> percentile, the largest cost differences between test-positive and test-negative individuals were for hospital care (\$6035.00, 95% CI \$4647.50, \$7402.50) homecare (\$937.00, 95% CI \$389.50, \$1,508.00; higher only for females), and outpatient specialist care (\$407.00, 95% CI \$177.00, \$731.00; higher only for males). ED costs were \$170.00 (95% CI \$96.00, \$241.00) higher for test-positive individuals, while there were no differences in costs for outpatient primary care, medications, or laboratory

tests, and zero costs for mental health admission, complex continuing care, or long-term care. Outpatient cancer care costs were lower over the first year of follow-up by -\$521 (95% CI -\$708.50, -\$399.00) overall, but test-positive females had -\$844.00, (95% CI -\$1,462.50, -\$415.00) lower outpatient cancer care costs, with no detected difference for males.

#### *Censoring at long-term care entrance*

A total of 1,157 people (827, 71.5% in the test-positive group) entered long-term care within six months of follow-up, and 1,752 (1,165, 66.5% in the test-positive group) over 1-year follow-up. Results of sensitivity analyses censoring at entrance to long-term care were overall similar to the primary analyses, with the expected decreases in long-term care cost differences and resulting decrease in total costs (Supplemental Figure E4). Outpatient primary care costs and hospitalization cost differences were slightly lower than in the primary analyses.

#### *6-month health care cost differences*

Differences in annualized costs based on 6 month follow-up overall and stratified by sex are shown in Supplemental Figure E5. Magnitudes and patterns of person-specific total and component health care cost differences were similar for 6-month and 1-year follow-up, with the exceptions of long-term care, home care, outpatient medications, and outpatient primary care costs. Mean differences in person-specific long-term care and home care costs at 6-month follow-up were approximately half those for 1-year follow-up both males and females; for 6-month follow-up, test-positive males had higher mean outpatient primary care costs but no detected cost difference for 1-year follow-up. The magnitude of decrease in person-specific, mean outpatient cancer care costs were similar for 6-month and 1-year follow-up.

For 6-month follow-up, cost differences at the 99<sup>th</sup> percentile generally similar in pattern and magnitude to those at 1-year follow-up, with the exceptions of outpatient

primary, homecare, cancer care costs (for females) and outpatient medication costs (for males). At 6-months, test-positive females had higher outpatient primary care costs than test-negative females; at 1-year follow-up, there was no detected cost difference in outpatient primary care costs for females or males. Annualized 6-month homecare cost differences for females were nearly half those at 1-year follow-up, with a 6-month cost difference of \$1,031.00 (95% CI \$432.00, \$1,504.00) and 1-year cost difference of \$2,103.00 (95% CI \$1,150.50, \$2,939.50). For test-positive females, cancer care costs were lower than matched test-negative females, with a larger gap at 1-year follow up: at 6-month follow-up, the cost difference for cancer care was -\$161.00 (95% CI -\$353.00, \$0.00); at 1-year follow-up, the cost-difference was -\$844.00 (95% CI -\$1,462.50, -\$415.00). For males, 6-month outpatient medication costs were lower for test-positive versus test-negative males, with no detected difference at 1-year for males or females. For both 6-month and 1-year follow-up, 99<sup>th</sup> percentile costs for long-term care, complex continuing care, and mental health hospitalizations were zero.

*Relative risks of post-acute high costs, any health care costs*

RR for being a high-cost user of six component costs (outpatient cancer, rehabilitation, home care, mental health hospitalization, complex continuing care, and long-term care) were generally of smaller magnitude at 1-year follow-up than 6-month, with notable differences by sex (Table 2; Supplemental Table E5 for risk differences). For test-positive males, there was no detected difference in their RR of being a high-cost user of long-term care at either 6-month or 1-year follow-up; their 6-month RR were >1 for being high-cost users of outpatient care, rehabilitation, homecare, mental health hospitalization, and complex continuing care, but by 1-year follow-up only the RR of being a high-cost user of complex continuing care remained statistically significant. In contrast for test-positive females, 1-year RR for being high-cost users of outpatient cancer care, rehabilitation, mental health hospitalization, complex continuing care, and

long-term care remained statistically significant, with smaller magnitude than 6-month RRs.

For any 6-month or 1-year post-acute cancer care, rehabilitation, home care, mental health hospitalization, complex continuing care, or long-term care, there was no detected difference for test-positive males compared to test-negative males. For test-positive females the risk was lower at 1-year compared to test-negative individuals. The RR for any outpatient cancer costs was lowest at 6-months and at 1-year follow-up remained lower compared to test-negative individuals for both males and females. RR of any spending on rehabilitation, home care, complex continuing care, and long-term care were highest for 6-month follow-up and generally decreased by 1-year but remained elevated compared to test-negative individuals. For males at 1-year there was no detected difference in the risk of any homecare costs compared to test-negative individuals.

## Discussion

Among 531,182 matched adults, post-acute ( $\geq 56$  days after PCR testing) person-specific health care costs in the first year of follow-up were on average \$487 higher (\$513 for females, \$459 for males) for individuals who had a positive SARS-CoV-2 PCR test compared to matched, test-negative individuals. Cost differences at the 99<sup>th</sup> percentile over the first year of follow-up were \$13,306 higher (\$12,533 for females, \$14,604 for males) for test-positive individuals. With annual mean health care expenditures of \$4,800 per-person in Ontario for 2020,<sup>29</sup> this represents >10% increase in mean health care costs over the first year of post-acute follow-up for test-positive individuals. In a conservative estimate based on a mean cost difference half that of our results and only half of adults in Ontario infected, this would translate to an estimated additional \$1.52 billion health care costs over one year of post-acute follow-up. Such a conservative estimate does not account for costs that may extend beyond a year of post-acute follow-up or the potential for greater cost differences for re-infections.

The largest cost differences at the mean and 99<sup>th</sup> percentile for both males and females was for hospital costs. At the mean, this was followed by long-term care and complex continuing care costs differences, while at the 99<sup>th</sup> percentile the next largest cost differences were for homecare (for females), outpatient specialist (for males), and emergency department costs. We did not find evidence for increased costs for mental health hospitalizations, and for test-positive females mental health hospitalization costs were lower than matched test-negative women.

Primary care and emergency department mean costs were higher for test-positive individuals (\$9.27 and \$12.14, respectively). While person-specific dollar amounts for these cost differences are smaller compared to those for hospital (\$243.00) or long-term care (\$102.16), access to primary care is the lynchpin of the healthcare system,<sup>30</sup> and >40% of adults seek emergency department care at least once a year.<sup>31</sup>

Thus, any increased primary care or emergency department costs following SARS-CoV-2 infection are likely to have clinically important consequences in a health care system already functioning beyond capacity, particularly if such an increase is sustained.<sup>32</sup>

Notably, outpatient mean cancer care costs were lower for test-positive individuals, and at the 99<sup>th</sup> percentile outpatient cancer care costs were more than \$800 lower for test-positive females over the first year of follow-up, with no detected difference for males. Overall, test-positive individuals were also less likely to have any outpatient cancer care costs, while test-positive women had increased risk of being a high-cost outpatient cancer care user over the first year of follow-up. Taken together, this raises the possibility that cancer diagnosis and/or treatment may have been impacted by SARS-CoV-2 infection, post-acute complications, or their impact on the healthcare system, and it is in line with previous work raising concerns about increases in undetected cancer cases since the start of the COVID-19 pandemic.<sup>33</sup>

We did not find that cost differences returned to baseline over the first year of follow-up. Similar total and component health care cost differences at 6-month and 1-year follow-up suggest sustained, increased health care costs following SARS-CoV-2 infection, even when follow-up began 56 days after a positive PCR.

Our findings are consistent with growing evidence that patient-reported post-acute symptoms and complications are common and persistent.<sup>34-41</sup> An estimated 10% of people meet criteria for long COVID following SARS-CoV-2 infection, with incidence and prevalence varying by case definition, outcome measures, pandemic phase, vaccination status, and follow-up duration.<sup>42-44</sup> Two studies have addressed post-acute COVID-19 health care costs, though both were limited to 6-month follow-up of populations covered by specific health insurance programs early in the pandemic, used diagnosis codes to identify COVID-19 cases, and they were conducted in the U.S., which has the highest health care costs in the world.<sup>45-47</sup> Six-month health care costs

(i.e., money paid by insurance companies for provision of medical care) for commercially insured patients <65 years of age were 1.46 times higher than matched controls,<sup>45</sup> and compared to pre-pandemic controls, mean cost differences for people after COVID-19 were higher and driven largely by hospital costs: mean cost difference \$763/month USD for commercially insured patients; mean cost difference \$2,337/month USD for Medicare patients.<sup>46</sup> One additional study in the US examined condition-specific health care utilization in the year following a clinical diagnosis of COVID-19, and also found increased risk of mortality and health care utilization for a range of disease conditions.<sup>47</sup> These likely underestimate total health care use and cost differences, as home-based and long-term medical care is often not covered by health insurance in the U.S.

Our population-level data for a large, universal health care system reduces risks of selection bias and differential follow-up. Use of health care costs rather than diagnostic codes or patient-reported symptoms reduces the risk of recall bias, and our findings are likely generalizable to other similar universal health care systems. We examined the totality of publically funded health care costs, which includes home health aids, home visits by nurses, assisted living, rehabilitation, and nursing home care as well as hospital, clinic, and outpatient medications costs, and we were able to examine outpatient costs for primary care, specialist, and cancer care separately. Use of PCR to identify cases likely biases our results towards the null by underestimating true burden infection,<sup>48,49</sup> but we chose a highly specific case definition in order to fully examine post-acute health care costs with less risk of erroneously classifying people as having had SARS-CoV-2 infection. Our findings may further have been biased towards the null by likely overrepresentation of ill people in the test-negative population, e.g., patients undergoing repeated PCR testing for chemotherapy, dialysis, etc. Our findings indicate that in addition to higher mean post-acute health care costs, a small proportion of individuals had markedly higher health care costs following infection, and while hospital

costs were the main driver of total cost, important costs were also incurred in settings other than the hospital or outpatient clinics.

We also add to existing literature regarding sex differences in COVID-19<sup>50-57</sup> by identifying sex differences for component health care costs. Test-positive males had higher mean cost differences for rehabilitation and mental health care, while test-positive women had higher mean cost differences for outpatient medications, primary care, homecare, and long-term care. Further work is needed to examine the interplay between social factors (e.g., caregiver availability for men versus women) and biological factors in order to appropriate plan for and allocate long COVID resources.

With few protective measures in place to prevent ongoing airborne spread and many people therefore expected to contract one or more SARS-CoV-2 infection annually,<sup>38</sup> sustained health care cost increases of the magnitude we describe will require significant health care system restructuring, innovation, and investment of resources, particularly for health systems with existing prolonged wait times to access care, insufficient supply of acute and long-term care beds, or projected loss of health care workers.<sup>58-66</sup> Health care workers appear to have higher risk of infection and developing post-acute complications, with 18% unable to return to pre-infection clinical workloads, including nearly half of whom were infected after been fully vaccinated.<sup>67-69</sup> Further, our findings do not account for costs related to disability, unemployment, or reduced quality of life after acute COVID-19, which has been reported to be comparable to that of stage 4 lung cancer.<sup>67,70-74</sup> Implementing protections and other measures to prepare for post-acute complications of SARS-CoV-2 infection could forestall considerably avoidable health care and other costs.<sup>75</sup>

### *Limitations*

We compared individuals with positive PCR tests to those with negative test results and matched on myriad baseline healthcare access and use, thus our findings



may not generalize to people who do not have similar access to medical care. To address time trends in testing and changes to the health care system during early phases of the pandemic,<sup>58,76-78</sup> we used both propensity score matching and hard matching by sex/pregnancy status, 2-week time blocks, public health unit, and vaccination status. Despite extensive matching including multiple socio-demographic and clinical factors, there is potential residual confounding by unmeasured variables such as body mass index or symptoms severity and duration, although control individuals may also not have had symptoms. However, growing evidence suggests that even so-called mild infections (e.g., those caused by omicron variants or that did not result in hospitalization) are associated with important post-acute complications that, combined with the large number of infections, have important health system implications.<sup>79</sup> Questions also remain whether healthcare costs remain elevated beyond a year of follow-up, as well as whether vaccine recency and reinfection may modify the trajectory and duration of post-acute complications.<sup>80-84</sup> This study also cannot address health care needs that did not result in seeking medical care or health care costs incurred outside of the traditional health care system.

### *Conclusions*

Over the first year of post-acute follow-up, health care costs after a positive SARS-CoV-2 PCR test are significantly higher compared to matched test-negative individuals, with the largest increases in mean person-specific health care costs for hospitalization, long-term care and complex continuing care, while increases in the 99<sup>th</sup> percentile of costs were driven by hospitalizations, outpatient specialists (for males), and homecare costs (for women). Outpatient cancer care costs were lower, raising concerns about potential delays in diagnosis or treatment. Differences in health care costs were similar at 6-month and 1-year follow-up. These findings can be used by policymakers to anticipate and plan for post-acute health care costs following SARS-CoV-2 infection.

## **Acknowledgments**

This study was supported by ICES, which is funded in part by an annual grant from the Ontario Ministry of Health and the Ministry of Long-Term Care (MOHLTC). Part of this material is based on data and/or information compiled and provided by the Canadian Institute for Health Information (CIHI). The authors acknowledge that the clinical registry data used in this publications is from participating hospitals through CorHealth Ontario, which serves as an advisory body to the MOHLTC, is funded by the MOHLTC, and is dedicated to improving the quality, efficiency, access and equity in the delivery of the continuum of adult cardiac, vascular and stroke services in Ontario, Canada. The authors thank IQVIA Solutions Canada Inc. for use of their Drug Information File. Parts of this report are based on Ontario Registrar General (ORG) information on deaths, the original source of which is ServiceOntario. This study was supported by the Ontario Health Data Platform (OHDP), and Province of Ontario initiative to support Ontario's ongoing response to COVID-19 and its related impacts. Parts of this material are based on data and/or information compiled and provided by CIHI and Cancer Care Ontario (CCO). The analyses, results, conclusions, opinions, and statements reported are those of the authors and are independent of the data and funding sources. No endorsements by ICES, the Ontario MOHLTC, CIHI, OHDP or its partners, ORG or the Ministry of Government Services, CCO, or the Province of Ontario is intended or should be inferred.

Dr. McNaughton is supported by the Sunnybrook Research Institute, the Practice Plan of the Department of Emergency Services at Sunnybrook Health Sciences Centre, and the University of Toronto.

Dr. Atzema is supported by the Sunnybrook Research Institute, the Practice Plan of the Department of Emergency Services at Sunnybrook Health Sciences Centre, and by a Mid-Career Investigator Award from the Heart and Stroke Foundation.

## References

1. StatCan. Between April and August 2022, 98% of Canadians had antibodies against COVID-19 and 54% had antibodies from a previous infection. [https://www150.statcan.gc.ca/n1/daily-quotidien/230327/dq230327b-eng.htm?fbclid=IwAR0jVe20IawIj2JDuAcDFkS30jfffEo04UHM9F281bVJxvBm\\_Sm0z7C0qvQ](https://www150.statcan.gc.ca/n1/daily-quotidien/230327/dq230327b-eng.htm?fbclid=IwAR0jVe20IawIj2JDuAcDFkS30jfffEo04UHM9F281bVJxvBm_Sm0z7C0qvQ) Last accessed March 20, 2023.
2. COVID-19 Immunity Task Force. Seroprevalence against SARS-CoV-2 due to infection in Canada: Results from the Government of Canada's COVID-19 Immunity Task Force and other partners' funded studies through to May 31, 2022. [https://www.covid19immunitytaskforce.ca/wp-content/uploads/2022/07/CITF\\_Bespoke-report\\_Omicron-tsunami\\_2022\\_FINAL\\_ENG.pdf](https://www.covid19immunitytaskforce.ca/wp-content/uploads/2022/07/CITF_Bespoke-report_Omicron-tsunami_2022_FINAL_ENG.pdf) Last accessed August 29, 2022.
3. WHO Coronavirus (COVID-19) Dashboard. <https://covid19.who.int>. Last accessed March 29, 2023.
4. Tsui TCO, Zeitouny S, Bremner KE, et al. Initial health care costs for COVID-19 in British Columbia and Ontario, Canada: an interprovincial population-based cohort study. *CMAJ Open*. 2022;10(3):E818-E830.
5. Xie Y, Xu E, Bowe B, Al-Aly Z. Long-term cardiovascular outcomes of COVID-19. *Nat Med*. 2022.
6. Alvarez-Garcia J, Jaladanki S, Rivas-Lasarte M, et al. New Heart Failure Diagnoses Among Patients Hospitalized for COVID-19. *J Am Coll Cardiol*. 2021;77(17):2260-2262.
7. O'Mahoney LL, Routen A, Gillies C, et al. The prevalence and long-term health effects of Long Covid among hospitalised and non-hospitalised populations: A systematic review and meta-analysis. *EClinicalMedicine*. 2023;55:101762.

8. Xie Y, Al-Aly Z. Risks and burdens of incident diabetes in long COVID: a cohort study. *Lancet Diabetes Endocrinol*. 2022;10(5):311-321.
9. Xu E, Xie Y, Al-Aly Z. Long-term gastrointestinal outcomes of COVID-19. *Nat Commun*. 2023;14(1):983.
10. Xu E, Xie Y, Al-Aly Z. Risks and burdens of incident dyslipidaemia in long COVID: a cohort study. *Lancet Diabetes Endocrinol*. 2023;11(2):120-128.
11. Government of Canada. Post COVID-19 condition (long COVID). <https://www.canada.ca/en/public-health/services/diseases/2019-novel-coronavirus-infection/symptoms/post-covid-19-condition.html>. Accessed July 1, 2023.
12. Tartof SY, Malden DE, Liu IA, et al. Health Care Utilization in the 6 Months Following SARS-CoV-2 Infection. *JAMA Netw Open*. 2022;5(8):e2225657.
13. McNaughton CD, Austin PC, Sivaswamy A, et al. Post-acute health care burden after SARS-CoV-2 infection: a retrospective cohort study. *CMAJ*. 2022;194(40):E1368-E1376.
14. Schull MJ, Azimae M, Marra M, et al. ICES: Data, Discovery, Better Health. *Int J Popul Data Sci*. 2020;4(2):1135.
15. Fernandez-de-Las-Penas C, Palacios-Cena D, Gomez-Mayordomo V, Cuadrado ML, Florencio LL. Defining Post-COVID Symptoms (Post-Acute COVID, Long COVID, Persistent Post-COVID): An Integrative Classification. *Int J Environ Res Public Health*. 2021;18(5).
16. Akbarialiabad H, Taghrir MH, Abdollahi A, et al. Long COVID, a comprehensive systematic scoping review. *Infection*. 2021;49(6):1163-1186.
17. Nalbandian A, Sehgal K, Gupta A, et al. Post-acute COVID-19 syndrome. *Nat Med*. 2021;27(4):601-615.

18. Soriano JB, Murthy S, Marshall JC, Relan P, Diaz JV. W. H. O. Clinical Case Definition Working Group on Post-COVID-19 Condition. A clinical case definition of post-COVID-19 condition by a Delphi consensus. *Lancet Infect Dis*. 2021.
19. Austin PC. An Introduction to Propensity Score Methods for Reducing the Effects of Confounding in Observational Studies. *Multivariate Behav Res*. 2011;46(3):399-424.
20. Austin PC. Optimal caliper widths for propensity-score matching when estimating differences in means and differences in proportions in observational studies. *Pharm Stat*. 2011;10(2):150-161.
21. Austin PC. Balance diagnostics for comparing the distribution of baseline covariates between treatment groups in propensity-score matched samples. *Stat Med*. 2009;28(25):3083-3107.
22. Guilcher SJ, Bronskill SE, Guan J, Wodchis WP. Who Are the High-Cost Users? A Method for Person-Centred Attribution of Health Care Spending. *PLoS One*. 2016;11(3):e0149179.
23. Wodchis WP, Austin PC, Henry DA. A 3-year study of high-cost users of health care. *CMAJ*. 2016;188(3):182-188.
24. Tharakan T, Khoo CC, Giwercman A, et al. Are sex disparities in COVID-19 a predictable outcome of failing men's health provision? *Nat Rev Urol*. 2022;19(1):47-63.
25. Gebhard C, Regitz-Zagrosek V, Neuhauser HK, Morgan R, Klein SL. Impact of sex and gender on COVID-19 outcomes in Europe. *Biol Sex Differ*. 2020;11(1):29.
26. Austin PC, Tu JV, Daly PA, Alter DA. The use of quantile regression in health care research: a case study examining gender differences in the timeliness of thrombolytic therapy. *Stat Med*. 2005;24(5):791-816.

27. Austin PC, Small DS. The use of bootstrapping when using propensity-score matching without replacement: a simulation study. *Stat Med*. 2014;33(24):4306-4319.
28. Austin PC. The performance of different propensity-score methods for estimating relative risks. *J Clin Epidemiol*. 2008;61(6):537-545.
29. Financial Accountability Office of Ontario. 2020-21 Interprovincial Comparison: Comparing Ontario's fiscal position with other provinces after the first year of the COVID-19 pandemic. [https://www.fao-on.org/web/default/files/publications/EC2004 Provincial Comparison/2020-21 Interprovincial Comparison - EN.pdf](https://www.fao.on.org/web/default/files/publications/EC2004%20Provincial%20Comparison/2020-21%20Interprovincial%20Comparison%20-%20EN.pdf) Accessed July 4, 2023.
30. Duong D, Vogel L. National survey highlights worsening primary care access. *CMAJ*. 2023;195(16):E592-E593.
31. Duffy J, Jones P, McNaughton CD, et al. Emergency department utilization, admissions, and revisits in the United States (New York), Canada (Ontario), and New Zealand: A retrospective cross-sectional analysis. *Acad Emerg Med*. 2023.
32. Varner C. Emergency departments are in crisis now and for the foreseeable future. *CMAJ*. 2023;195(24):E851-E852.
33. Eskander A, Li Q, Yu J, et al. Incident Cancer Detection During the COVID-19 Pandemic. *J Natl Compr Canc Netw*. 2022;20(3):276-284.
34. Wu Q, Ailshire JA, Crimmins EM. Long COVID and symptom trajectory in a representative sample of Americans in the first year of the pandemic. *Sci Rep*. 2022;12(1):11647.

35. Whitaker M, Elliott J, Chadeau-Hyam M, et al. Persistent COVID-19 symptoms in a community study of 606,434 people in England. *Nat Commun.* 2022;13(1):1957.
36. Servier C, Porcher R, Pane I, Ravaud P, Tran VT. Trajectories of the evolution of post-COVID-19 condition, up to two years after symptoms onset. *Int J Infect Dis.* 2023;133:67-74.
37. Ballouz T, Menges D, Anagnostopoulos A, et al. Recovery and symptom trajectories up to two years after SARS-CoV-2 infection: population based, longitudinal cohort study. *BMJ.* 2023;381:e074425.
38. Altmann DM, Whettlock EM, Liu S, Arachchillage DJ, Boyton RJ. The immunology of long COVID. *Nat Rev Immunol.* 2023.
39. Kim Y, Bae S, Chang HH, Kim SW. Long COVID prevalence and impact on quality of life 2 years after acute COVID-19. *Sci Rep.* 2023;13(1):11207.
40. Peter RS, Nieters A, Krausslich HG, et al. Post-acute sequelae of covid-19 six to 12 months after infection: population based study. *BMJ.* 2022;379:e071050.
41. Long-term neurological sequelae of SARS-CoV-2 infection. *Nat Med.* 2022;28(11):2269-2270.
42. Thaweethai T, Jolley SE, Karlson EW, et al. Development of a Definition of Postacute Sequelae of SARS-CoV-2 Infection. *JAMA.* 2023.
43. Davis HE, McCorkell L, Vogel JM, Topol EJ. Long COVID: major findings, mechanisms and recommendations. *Nat Rev Microbiol.* 2023;21(3):133-146.
44. Abu Hamdh B, Nazzal Z. A prospective cohort study assessing the relationship between long-COVID symptom incidence in COVID-19 patients and COVID-19 vaccination. *Sci Rep.* 2023;13(1):4896.

45. Pike J, Kompaniyets L, Lindley MC, Saydah S, Miller G. Direct Medical Costs Associated With Post-COVID-19 Conditions Among Privately Insured Children and Adults. *Preventing chronic disease*. 2023;20:E06.
46. DeMartino JK, Swallow E, Goldschmidt D, et al. Direct health care costs associated with COVID-19 in the United States. *J Manag Care Spec Pharm*. 2022;28(9):936-947.
47. DeVries A, Shambhu S, Sloop S, Overhage JM. One-Year Adverse Outcomes Among US Adults With Post-COVID-19 Condition vs Those Without COVID-19 in a Large Commercial Insurance Database. *JAMA Health Forum*. 2023;4(3):e230010.
48. Axell-House DB, Lavingia R, Rafferty M, Clark E, Amirian ES, Chiao EY. The estimation of diagnostic accuracy of tests for COVID-19: A scoping review. *J Infect*. 2020;81(5):681-697.
49. Sundaram ME, Calzavara A, Mishra S, et al. Individual and social determinants of SARS-CoV-2 testing and positivity in Ontario, Canada: a population-wide study. *CMAJ*. 2021;193(20):E723-E734.
50. Bienvenu LA, Noonan J, Wang X, Peter K. Higher mortality of COVID-19 in males: sex differences in immune response and cardiovascular comorbidities. *Cardiovasc Res*. 2020;116(14):2197-2206.
51. Takahashi T, Ellingson MK, Wong P, et al. Sex differences in immune responses that underlie COVID-19 disease outcomes. *Nature*. 2020;588(7837):315-320.
52. Förster C, Colombo MG, Wetzel AJ, Martus P, Joos S. Persisting Symptoms After COVID-19-Prevalence and Risk Factors in a Population-Based Cohort. *Dtsch Arztebl Int*. 2022(Forthcoming).
53. Kashif A, Chaudhry M, Fayyaz T, et al. Follow-up of COVID-19 recovered patients with mild disease. *Sci Rep*. 2021;11(1):13414.



54. Bliddal S, Banasik K, Pedersen OB, et al. Acute and persistent symptoms in non-hospitalized PCR-confirmed COVID-19 patients. *Sci Rep.* 2021;11(1):13153.
55. Augustin M, Schommers P, Stecher M, et al. Post-COVID syndrome in non-hospitalised patients with COVID-19: a longitudinal prospective cohort study. *Lancet Reg Health Eur.* 2021;6:100122.
56. Stavem K, Ghanima W, Olsen MK, Gilboe HM, Einvik G. Persistent symptoms 1.5-6 months after COVID-19 in non-hospitalised subjects: a population-based cohort study. *Thorax.* 2021;76(4):405-407.
57. Wynberg E, van Willigen HDG, Dijkstra M, et al. Evolution of COVID-19 symptoms during the first 12 months after illness onset. *Clin Infect Dis.* 2021.
58. Financial Accountability Office of Ontario. Ministry of Health: 2021 Spending Plan Review. <https://www.fao-on.org/en/Blog/Publications/2021-health-estimates>. Last accessed March 4, 2022.
59. Canadian Institute for Health Information. The Impact of COVID-19 on Long-Term Care in Canada: Focus on the First 6 Months. Ottawa, ON: CIHI; 2021.
60. Barrett KA, Vande Vyvere C, Haque N, et al. Critical care capacity during the COVID-19 pandemic. Science Briefs of the Ontario COVID-19 Science Advisory Table. 2021;2(51). <https://doi.org/10.47326/ocsat.2021.02.51.1.0>.
61. Brophy JT, Keith MM, Hurley M, McArthur JE. Sacrificed: Ontario Healthcare Workers in the Time of COVID-19. *New Solut.* 2021;30(4):267-281.
62. Cantor J, Whaley C, Simon K, Nguyen T. US Health Care Workforce Changes During the First and Second Years of the COVID-19 Pandemic. *JAMA Health Forum.* 2022;3(2):e215217-e215217.
63. Wilensky GR. The COVID-19 Pandemic and the US Health Care Workforce. *JAMA Health Forum.* 2022;3(1):e220001-e220001.

64. Wang J, Vahid S, Eberg M, et al. Clearing the surgical backlog caused by COVID-19 in Ontario: a time series modelling study. *CMAJ*. 2020;192(44):E1347-E1356.
65. Salenger R, Etchill EW, Ad N, et al. The Surge After the Surge: Cardiac Surgery Post-COVID-19. *Ann Thorac Surg*. 2020;110(6):2020-2025.
66. Khan JR, Awan N, Islam MM, Muurlink O. Healthcare Capacity, Health Expenditure, and Civil Society as Predictors of COVID-19 Case Fatalities: A Global Analysis. *Front Public Health*. 2020;8:347.
67. British Medical Association. Over-exposed and under-protected: the long-term impact of COVID-19 on doctors. <https://www.bma.org.uk/media/7318/bma-long-covid-report040723.pdf> Accessed July 14, 2023.
68. Peters C, Dulon M, Westermann C, Kozak A, Nienhaus A. Long-Term Effects of COVID-19 on Workers in Health and Social Services in Germany. *Int J Environ Res Public Health*. 2022;19(12).
69. Marra AR, Sampaio VS, Ozahata MC, et al. Risk factors for long coronavirus disease 2019 (long COVID) among healthcare personnel, Brazil, 2020-2022. *Infect Control Hosp Epidemiol*. 2023:1-7.
70. U.S. Bureau of Labor Statistics, compiled by FRED Economic Data. Population with a disability, 16 years and over. <https://fred.stlouisfed.org/series/LNU00074597> Accessed July 14, 2023.
71. U.S. Health and Human Services. Health+ Long COVID report. November 2022. <https://www.hhs.gov/sites/default/files/healthplus-long-covid-report.pdf>. Accessed July 14, 2023.

72. Cutler DM. The economic cost of Long COVID: An update. Harvard University.  
[https://scholar.harvard.edu/files/cutler/files/long\\_covid\\_update\\_7-22.pdf](https://scholar.harvard.edu/files/cutler/files/long_covid_update_7-22.pdf)  
July 2022. Access July 14, 2023
73. New York State Insurance Fund report on Long-term impacts of COVID-19.  
[https://ww3.nysif.com/en/FooterPages/Column1/AboutNYSIF/NYSIF\\_News/2023/20230124LongCovid](https://ww3.nysif.com/en/FooterPages/Column1/AboutNYSIF/NYSIF_News/2023/20230124LongCovid) Accessed July 14, 2023.
74. Walker S, Goodfellow H, Pookarnjanamorakot P, et al. Impact of fatigue as the primary determinant of functional limitations among patients with post-COVID-19 syndrome: a cross-sectional observational study. *BMJ open*. 2023;13(6):e069217.
75. Peng A, Simmons A, Amoako A, Tuite A, Fisman D. Relative pandemic severity in Canada and four peer nations during the SARS-CoV-2 pandemic. *Can Commun Des Rep* 2023;49(5):197-205.  
<https://doi.org/10.14745/ccdr.v49i05a05>.
76. Howarth A, Munro M, Theodorou A, Mills PR. Trends in healthcare utilisation during COVID-19: a longitudinal study from the UK. *BMJ open*. 2021;11(7):e048151.
77. Moynihan R, Sanders S, Michaleff ZA, et al. Impact of COVID-19 pandemic on utilisation of healthcare services: a systematic review. *BMJ open*. 2021;11(3):e045343.
78. Mehrotra A, Bhatia RS, Snoswell CL. Paying for Telemedicine After the Pandemic. *JAMA*. 2021;325(5):431-432.
79. Iuliano AD, Brunkard JM, Boehmer TK, et al. Trends in Disease Severity and Health Care Utilization During the Early Omicron Variant Period Compared with

- Previous SARS-CoV-2 High Transmission Periods - United States, December 2020-January 2022. *MMWR Morb Mortal Wkly Rep.* 2022;71(4):146-152.
80. Mizrahi B, Sudry T, Flaks-Manov N, et al. Long covid outcomes at one year after mild SARS-CoV-2 infection: nationwide cohort study. *BMJ.* 2023;380:e072529.
81. Tsampasian V, Elghazaly H, Chattopadhyay R, et al. Risk Factors Associated With Post-COVID-19 Condition: A Systematic Review and Meta-analysis. *JAMA internal medicine.* 2023;183(6):566-580.
82. Antonelli M, Penfold RS, Merino J, et al. Risk factors and disease profile of post-vaccination SARS-CoV-2 infection in UK users of the COVID Symptom Study app: a prospective, community-based, nested, case-control study. *Lancet Infect Dis.* 2022;22(1):43-55.
83. Tsuchida T, Hirose M, Inoue Y, Kunishima H, Otsubo T, Matsuda T. Relationship between changes in symptoms and antibody titers after a single vaccination in patients with Long COVID. *J Med Virol.* 2022.
84. Liu L, Iketani S, Guo Y, et al. Striking antibody evasion manifested by the Omicron variant of SARS-CoV-2. *Nature.* 2022;602(7898):676-681.

## Figure Legends

**Figure 1:** Difference in annual mean health care costs (95% confidence intervals in 2020 \$CAD; starting 56 days after polymerase chain reaction test) for test-positive versus test-negative matched individuals, overall and by sex. Note range -\$200 to +\$600

**Figure 2:** Difference in annual 99th percentile health care costs (95% confidence intervals in 2020 \$CAD; starting 56 days after polymerase chain reaction test) for test-positive versus test-negative matched individuals, overall and by sex. Note range - \$1,000 to +\$20,000

**Table 1:** Baseline demographics and clinical characteristics of the matched cohort

**Table 2:** Relative risks comparing test-positive versus test-negative people, overall and by sex, for: (A) being a high-cost health care user (>95th percentile) for 6-month and 1-year follow-up, and (B) any post-acute health care cost (>\$0) within 6 months and 1 year of follow-up

**Table 1:** Baseline demographics and clinical characteristics of the matched cohort and characteristics used for matching\*

|                                    |                | Test Negative<br>N=265,591 | Test Positive<br>N=265,591 | Standardized<br>Difference |
|------------------------------------|----------------|----------------------------|----------------------------|----------------------------|
| Age (years)                        | Mean (SD)      | 44.11 (17.16)              | 44.18 (17.17)              | 0.004                      |
|                                    | Median (Q1-Q3) | 43 (29-56)                 | 43 (29-56)                 | 0.004                      |
| Female                             | n (%)          | 134,105 (50.5%)            | 134,105 (50.5%)            | 0                          |
| Rural                              | n (%)          | 9,703 (3.7%)               | 9,532 (3.6%)               | 0.003                      |
| Johns Hopkins Frailty Score        | n (%)          | 7,688 (2.9%)               | 7,636 (2.9%)               | 0.001                      |
| Recent flu vaccination             | n (%)          | 65,638 (24.7%)             | 65,885 (24.8%)             | 0.002                      |
| Hypertension                       | n (%)          | 60,493 (22.8%)             | 60,919 (22.9%)             | 0.004                      |
| Diabetes                           | n (%)          | 36,510 (13.7%)             | 37,104 (14.0%)             | 0.006                      |
| Emphysema                          | n (%)          | 4,043 (1.5%)               | 4,053 (1.5%)               | 0                          |
| Heart failure                      | n (%)          | 4,875 (1.8%)               | 4,898 (1.8%)               | 0.001                      |
| Dementia                           | n (%)          | 3,143 (1.2%)               | 3,193 (1.2%)               | 0.002                      |
| Asthma                             | n (%)          | 28,040 (10.6%)             | 27,940 (10.5%)             | 0.001                      |
| Cancer                             | n (%)          | 4,885 (1.8%)               | 4,730 (1.8%)               | 0.004                      |
| Surgery in previous 6 weeks        | n (%)          | 2,251 (0.8%)               | 2,175 (0.8%)               | 0.003                      |
| Ischemic stroke                    | n (%)          | 2,524 (1.0%)               | 2,508 (0.9%)               | 0.001                      |
| Hemorrhagic stroke                 | n (%)          | 261 (0.1%)                 | 220 (0.1%)                 | 0.005                      |
| Valvular disease                   | n (%)          | 234 (0.1%)                 | 232 (0.1%)                 | 0                          |
| Atrial fibrillation                | n (%)          | 4,894 (1.8%)               | 4,815 (1.8%)               | 0.002                      |
| Acute myocardial infarction        | n (%)          | 1,750 (0.7%)               | 1,758 (0.7%)               | 0                          |
| Percutaneous coronary intervention | n (%)          | 2,124 (0.8%)               | 2,186 (0.8%)               | 0.003                      |
| Coronary artery bypass graft       | n (%)          | 641 (0.2%)                 | 639 (0.2%)                 | 0                          |
| Ischemic heart disease             | n (%)          | 9,755 (3.7%)               | 9,708 (3.7%)               | 0.001                      |
| Major bleeding                     | n (%)          | 2,115 (0.8%)               | 2,098 (0.8%)               | 0.001                      |
| Renal disease                      | n (%)          | 2,630 (1.0%)               | 2,711 (1.0%)               | 0.003                      |
| Pneumonia                          | n (%)          | 19,479 (7.3%)              | 19,748 (7.4%)              | 0.004                      |
| Alcohol use disorder               | n (%)          | 1,527 (0.6%)               | 1,529 (0.6%)               | 0                          |
| Venous thromboembolism             | n (%)          | 24,096 (9.1%)              | 23,731 (8.9%)              | 0.005                      |
| Income Quintile 1                  | n (%)          | 66,141 (24.9%)             | 65,495 (24.7%)             | 0.006                      |

|                                                              |           |                    |                   |       |
|--------------------------------------------------------------|-----------|--------------------|-------------------|-------|
| Income Quintile 2                                            | n (%)     | 57,647 (21.7%)     | 57,816 (21.8%)    | 0.002 |
| Income Quintile 3                                            | n (%)     | 56,861 (21.4%)     | 56,985 (21.5%)    | 0.001 |
| Income Quintile 4                                            | n (%)     | 46,659 (17.6%)     | 47,195 (17.8%)    | 0.005 |
| Income Quintile 5                                            | n (%)     | 38,283 (14.4%)     | 38,100 (14.3%)    | 0.002 |
| Instability Quintile 1 (Least unstable)                      | n (%)     | 71,842 (27.0%)     | 72,103 (27.1%)    | 0.002 |
| Instability Quintile 2                                       | n (%)     | 44,802 (16.9%)     | 44,443 (16.7%)    | 0.004 |
| Instability Quintile 3                                       | n (%)     | 40,966 (15.4%)     | 40,637 (15.3%)    | 0.003 |
| Instability Quintile 4                                       | n (%)     | 43,344 (16.3%)     | 43,544 (16.4%)    | 0.002 |
| Instability Quintile 5 (Most unstable)                       | n (%)     | 64,637 (24.3%)     | 64,864 (24.4%)    | 0.002 |
| Deprivation Quintile 1 (Least deprived)                      | n (%)     | 44,432 (16.7%)     | 45,003 (16.9%)    | 0.006 |
| Deprivation Quintile 2                                       | n (%)     | 47,436 (17.9%)     | 47,516 (17.9%)    | 0.001 |
| Deprivation Quintile 3                                       | n (%)     | 52,444 (19.7%)     | 52,391 (19.7%)    | 0.001 |
| Deprivation Quintile 4                                       | n (%)     | 55,585 (20.9%)     | 55,454 (20.9%)    | 0.001 |
| Deprivation Quintile 5 (Most deprived)                       | n (%)     | 65,694 (24.7%)     | 65,227 (24.6%)    | 0.004 |
| Dependency Quintile 1 (Least dependent)                      | n (%)     | 91,415 (34.4%)     | 91,625 (34.5%)    | 0.002 |
| Dependency Quintile 2                                        | n (%)     | 59,585 (22.4%)     | 59,763 (22.5%)    | 0.002 |
| Dependency Quintile 3                                        | n (%)     | 43,941 (16.5%)     | 44,105 (16.6%)    | 0.002 |
| Dependency Quintile 4                                        | n (%)     | 37,817 (14.2%)     | 37,392 (14.1%)    | 0.005 |
| Dependency Quintile 5 (Most dependent)                       | n (%)     | 32,833 (12.4%)     | 32,706 (12.3%)    | 0.001 |
| Ethnic Concentration Quintile 1 (Least)                      | n (%)     | 17,661 (6.6%)      | 17,161 (6.5%)     | 0.008 |
| Ethnic Concentration Quintile 2                              | n (%)     | 24,946 (9.4%)      | 24,809 (9.3%)     | 0.002 |
| Ethnic Concentration Quintile 3                              | n (%)     | 34,340 (12.9%)     | 35,039 (13.2%)    | 0.008 |
| Ethnic Concentration Quintile 4                              | n (%)     | 56,073 (21.1%)     | 56,934 (21.4%)    | 0.008 |
| Ethnic Concentration Quintile 5 (Most)                       | n (%)     | 132,571 (49.9%)    | 131,648 (49.6%)   | 0.007 |
| ≥2 COVID vaccine doses                                       | n (%)     | 289 (0.1%)         | 289 (0.1%)        | 0     |
| 1-2 COVID vaccine doses                                      | n (%)     | 1,321 (0.5%)       | 1,321 (0.5%)      | 0     |
| 0 COVID vaccine doses                                        | n (%)     | 263,981 (99.4%)    | 263,981 (99.4%)   | 0     |
| Prior mental health hospitalization                          | n (%)     | 4,369 (1.6%)       | 4,272 (1.6%)      | 0.003 |
| Prior emergency department visit for mental health condition | n (%)     | 11,135 (4.2%)      | 11,069 (4.2%)     | 0.001 |
| Prior outpatient mental health visit                         | n (%)     | 48,100 (18.1%)     | 47,992 (18.1%)    | 0.001 |
| 1-year Baseline hospital-based costs                         | Mean (SD) | 1305.54 (10282.53) | 1241.99 (9505.14) | 0.006 |



|                                                 |                |                  |                  |       |
|-------------------------------------------------|----------------|------------------|------------------|-------|
|                                                 | Median (Q1-Q3) | 0 (0-0)          | 0 (0-0)          | 0.046 |
| 1-yr Baseline emergency department costs        | Mean (SD)      | 241.64 (806.06)  | 235.37 (977.53)  | 0.007 |
|                                                 | Median (Q1-Q3) | 0 (0-145)        | 0 (0-137)        | 0.009 |
| 1-yr Baseline medication costs                  | Mean (SD)      | 445.92 (3665.39) | 448.99 (2849.61) | 0.001 |
|                                                 | Median (Q1-Q3) | 0 (0-19)         | 0 (0-14)         | 0.022 |
| 1-yr Baseline outpatient-specialist costs       | Mean (SD)      | 668.03 (3554.04) | 664.41 (4084.39) | 0.001 |
|                                                 | Median (Q1-Q3) | 83 (0-486)       | 80 (0-455)       | 0.023 |
| 1-yr Baseline outpatient-cancer costs           | Mean (SD)      | 141.74 (2871.91) | 133.94 (3052.78) | 0.003 |
|                                                 | Median (Q1-Q3) | 0 (0-0)          | 0 (0-0)          | 0.016 |
| 1-yr Baseline outpatient-primary care costs     | Mean (SD)      | 331.42 (657.48)  | 331.64 (660.98)  | 0     |
|                                                 | Median (Q1-Q3) | 222 (102-377)    | 222 (99-384)     | 0.002 |
| 1-yr Baseline outpatient-lab costs              | Mean (SD)      | 50.46 (88.58)    | 50.50 (85.67)    | 0     |
|                                                 | Median (Q1-Q3) | 19 (0-68)        | 21 (0-70)        | 0.024 |
| 1-yr Baseline rehabilitation costs              | Mean (SD)      | 88.18 (1902.80)  | 82.94 (1754.76)  | 0.003 |
|                                                 | Median (Q1-Q3) | 0 (0-0)          | 0 (0-0)          | 0.005 |
| 1-yr Baseline homecare costs                    | Mean (SD)      | 215.08 (2503.13) | 218.73 (2268.92) | 0.002 |
|                                                 | Median (Q1-Q3) | 0 (0-0)          | 0 (0-0)          | 0.004 |
| 1-yr Baseline Mental health admission costs     | Mean (SD)      | 150.24 (4896.44) | 157.81 (5659.92) | 0.001 |
|                                                 | Median (Q1-Q3) | 0 (0-0)          | 0 (0-0)          | 0.019 |
| 1-yr Baseline complex and continuing care costs | Mean (SD)      | 123.31 (4234.60) | 122.23 (3879.81) | 0     |
|                                                 | Median (Q1-Q3) | 0 (0-0)          | 0 (0-0)          | 0.004 |
| 1-yr Baseline long-term care costs              | Mean (SD)      | 0.02 (4.14)      | 0.02 (5.50)      | 0.001 |
|                                                 | Median (Q1-Q3) | 0 (0-0)          | 0 (0-0)          | 0.002 |

\* Also matched by 2-week period of testing, public health unit, and Johns Hopkins ACG © diagnosis group categories 1-12

**Table 2:** Relative risks\* comparing test-positive versus test-negative people, overall and by sex, for: (A) being a high-cost health care user (>95th percentile) within 6 months and 1 year of follow-up, and (B) any post-acute health care cost (>\$0) within 6 months and 1 year of follow-up

**(A) High-cost defined as cost>95th percentile**

| Outcome             |                               | 6-months |                      |                      | 1-year |                      |                      |
|---------------------|-------------------------------|----------|----------------------|----------------------|--------|----------------------|----------------------|
|                     |                               | RR       | RR<br>lower<br>95%CI | RR<br>upper<br>95%CI | RR     | RR<br>lower<br>95%CI | RR<br>upper<br>95%CI |
| Overall (n=265,591) | Outpatient cancer             | 1.11     | 1.09                 | 1.14                 | 1.05   | 1.03                 | 1.08                 |
|                     | Rehabilitation                | 1.13     | 1.10                 | 1.16                 | 1.05   | 1.02                 | 1.07                 |
|                     | Home care                     | 1.07     | 1.05                 | 1.10                 | 1.02   | 1.00                 | 1.04                 |
|                     | Mental health hospitalization | 1.13     | 1.10                 | 1.15                 | 1.04   | 1.02                 | 1.06                 |
|                     | Complex continuing care       | 1.18     | 1.16                 | 1.21                 | 1.11   | 1.09                 | 1.14                 |
|                     | Long-term care                | 1.07     | 1.04                 | 1.09                 | 1.05   | 1.02                 | 1.07                 |
| Female (n=135,760)  | Outpatient cancer             | 1.15     | 1.12                 | 1.19                 | 1.09   | 1.05                 | 1.12                 |
|                     | Rehabilitation                | 1.18     | 1.14                 | 1.21                 | 1.09   | 1.05                 | 1.12                 |
|                     | Home care                     | 1.08     | 1.04                 | 1.11                 | 1.02   | 0.99                 | 1.06                 |
|                     | Mental health hospitalization | 1.15     | 1.12                 | 1.19                 | 1.04   | 1.01                 | 1.07                 |
|                     | Complex continuing care       | 1.19     | 1.16                 | 1.23                 | 1.12   | 1.09                 | 1.16                 |
|                     | Long-term care                | 1.09     | 1.05                 | 1.12                 | 1.07   | 1.04                 | 1.10                 |
| Male (n=129,831)    | Outpatient cancer             | 1.07     | 1.04                 | 1.11                 | 1.02   | 0.99                 | 1.05                 |
|                     | Rehabilitation                | 1.07     | 1.03                 | 1.11                 | 1.00   | 0.96                 | 1.03                 |
|                     | Home care                     | 1.07     | 1.03                 | 1.10                 | 1.01   | 0.98                 | 1.05                 |
|                     | Mental health hospitalization | 1.10     | 1.06                 | 1.14                 | 1.04   | 1.00                 | 1.08                 |
|                     | Complex continuing care       | 1.17     | 1.13                 | 1.21                 | 1.10   | 1.06                 | 1.14                 |
|                     | Long-term care                | 1.03     | 0.99                 | 1.07                 | 1.01   | 0.97                 | 1.05                 |

**(B) Any post-acute health care cost**

|                     | Outcome                       | 6-months |                      |                      | 1-year |                      |                      |
|---------------------|-------------------------------|----------|----------------------|----------------------|--------|----------------------|----------------------|
|                     |                               | RR       | RR<br>lower<br>95%CI | RR<br>upper<br>95%CI | RR     | RR<br>lower<br>95%CI | RR<br>upper<br>95%CI |
| Overall (n=265,591) | Outpatient cancer             | 0.73     | 0.69                 | 0.78                 | 0.79   | 0.75                 | 0.83                 |
|                     | Rehabilitation                | 2.42     | 2.12                 | 2.76                 | 1.67   | 1.51                 | 1.86                 |
|                     | Home care                     | 1.10     | 1.07                 | 1.13                 | 1.06   | 1.04                 | 1.09                 |
|                     | Mental health hospitalization | 0.97     | 0.88                 | 1.08                 | 0.89   | 0.82                 | 0.97                 |
|                     | Complex continuing care       | 2.05     | 1.86                 | 2.27                 | 1.68   | 1.54                 | 1.83                 |
|                     | Long-term care                | 2.46     | 2.20                 | 2.75                 | 2.04   | 1.86                 | 2.23                 |
| Female (n=135,760)  | Outpatient cancer             | 0.76     | 0.70                 | 0.82                 | 0.82   | 0.77                 | 0.88                 |
|                     | Rehabilitation                | 2.21     | 1.81                 | 2.71                 | 1.44   | 1.24                 | 1.68                 |
|                     | Home care                     | 1.13     | 1.09                 | 1.17                 | 1.09   | 1.06                 | 1.13                 |
|                     | Mental health hospitalization | 0.89     | 0.76                 | 1.04                 | 0.84   | 0.74                 | 0.95                 |
|                     | Complex continuing care       | 2.19     | 1.89                 | 2.53                 | 1.82   | 1.60                 | 2.06                 |
|                     | Long-term care                | 2.71     | 2.33                 | 3.16                 | 2.18   | 1.92                 | 2.46                 |
| Male (n=129,831)    | Outpatient cancer             | 0.70     | 0.63                 | 0.77                 | 0.75   | 0.69                 | 0.81                 |
|                     | Rehabilitation                | 2.58     | 2.16                 | 3.07                 | 1.90   | 1.65                 | 2.19                 |
|                     | Home care                     | 1.06     | 1.02                 | 1.10                 | 1.03   | 0.99                 | 1.06                 |
|                     | Mental health hospitalization | 1.05     | 0.91                 | 1.20                 | 0.94   | 0.84                 | 1.06                 |
|                     | Complex continuing care       | 1.94     | 1.69                 | 2.23                 | 1.55   | 1.38                 | 1.75                 |
|                     | Long-term care                | 2.18     | 1.85                 | 2.57                 | 1.87   | 1.63                 | 2.15                 |

\* McNemar test

**Figure 1:** Differences in person-specific annual mean health care costs\* for test-positive versus test-negative matched individuals, overall and by sex (95% confidence intervals in 2020 \$CAD; starting 56 days after polymerase chain reaction test). Note range \$200 to +\$600.

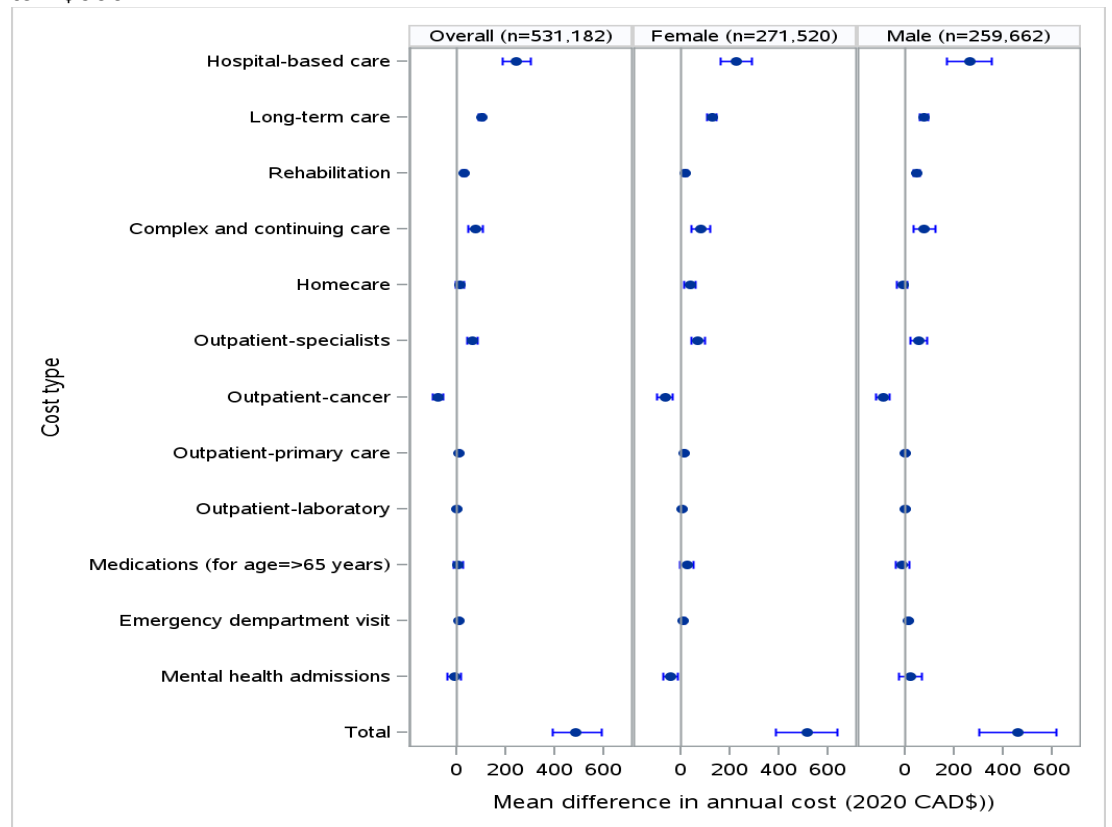

\* by paired T-test

**Figure 2:** Differences in person-specific annual 99th percentile health care costs\* for test-positive versus test-negative matched individuals, overall and by sex (95% confidence intervals<sup>28</sup> in 2020 \$CAD; starting 56 days after polymerase chain reaction test). Note range -\$1,000 to +\$20,000.

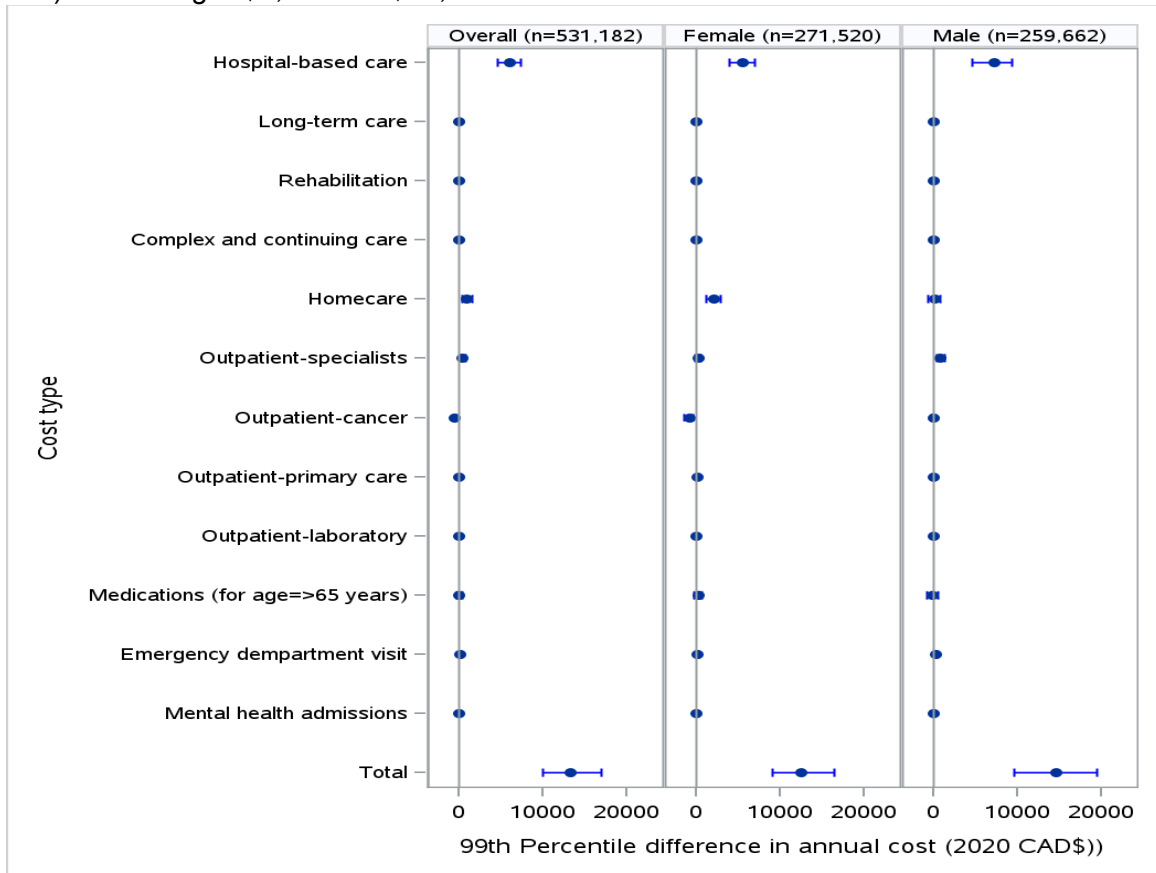

\* by paired T-test
